# Supplementary material
Source: PubMed Central journal article supplement (PMC4224326)

Ultraviolet photodissociation mass spectrometry provides an unprecedented level of structural information about intact lipooligosaccharides.

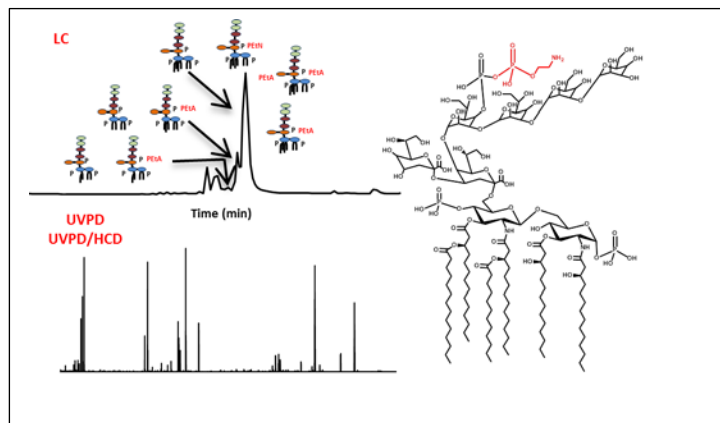

Supplement: NIHMS615805-supplement-Graphical_Abstract.pdf [file NIHMS615805-supplement-Graphical_Abstract.pdf]
