# Supplementary material
Source: PubMed Central journal article supplement (PMC4224326)
Supplement: NIHMS615805-supplement-Supplementary_Information.pdf [file NIHMS615805-supplement-Supplementary_Information.pdf]

**Top-Down Strategies for the Structural Elucidation of Intact Gram-negative  
Bacterial Endotoxins**

*John P. O'Brien, Brittany D. Needham, Dusty B. Brown, M. Stephen Trent and Jennifer S. Brodbelt*

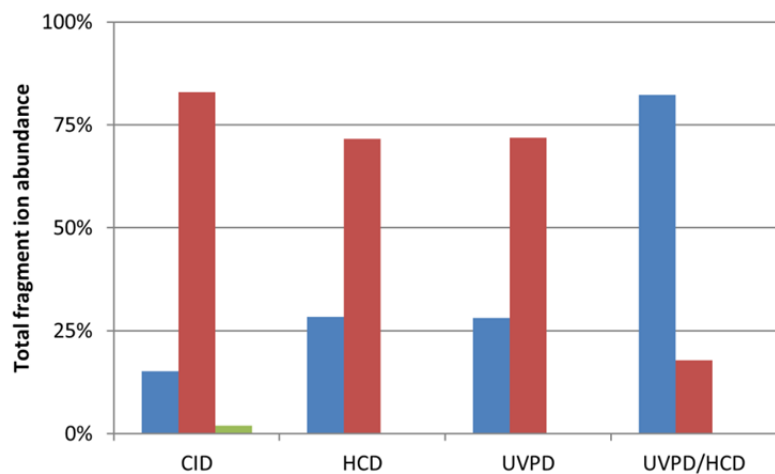

**Figure S1.** Histograms showing the distribution of multiply charged *E. coli* Kdo<sub>2</sub>-Lipid A fragment ions and singly charged fragment ions. Singly charged fragments are shown as blue bars, doubly charged fragments as red bars and triply charged fragments are shown as green bars.

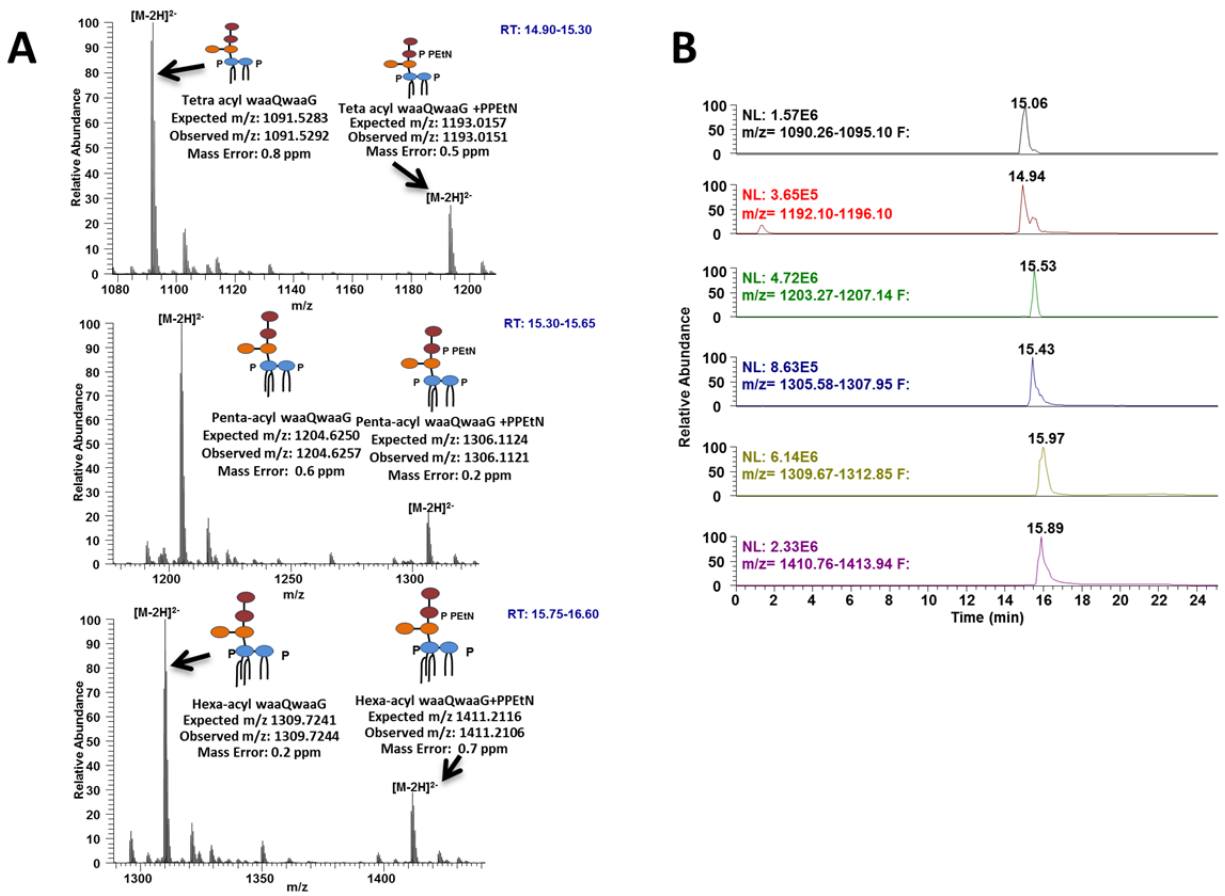

**Figure S2.** A) ESI-mass spectra of LOS separated within the BN1  $\Delta$ waaQwaaG sample and B) the extracted ion chromatograms of the key LOS identified.

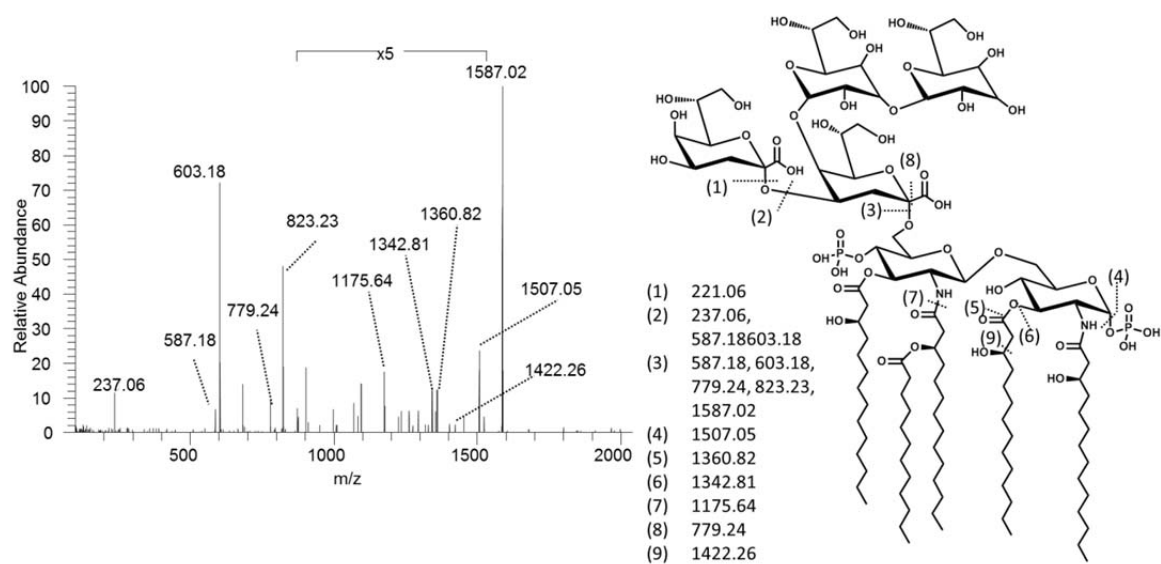

**Figure S3.** UVPD/HCD mass spectrum of penta-acyl waaQwaaG (z = 3-) [Mr = 2411.27] from BN1 ΔwaaQwaaG. The corresponding fragmentation map is shown on the right.

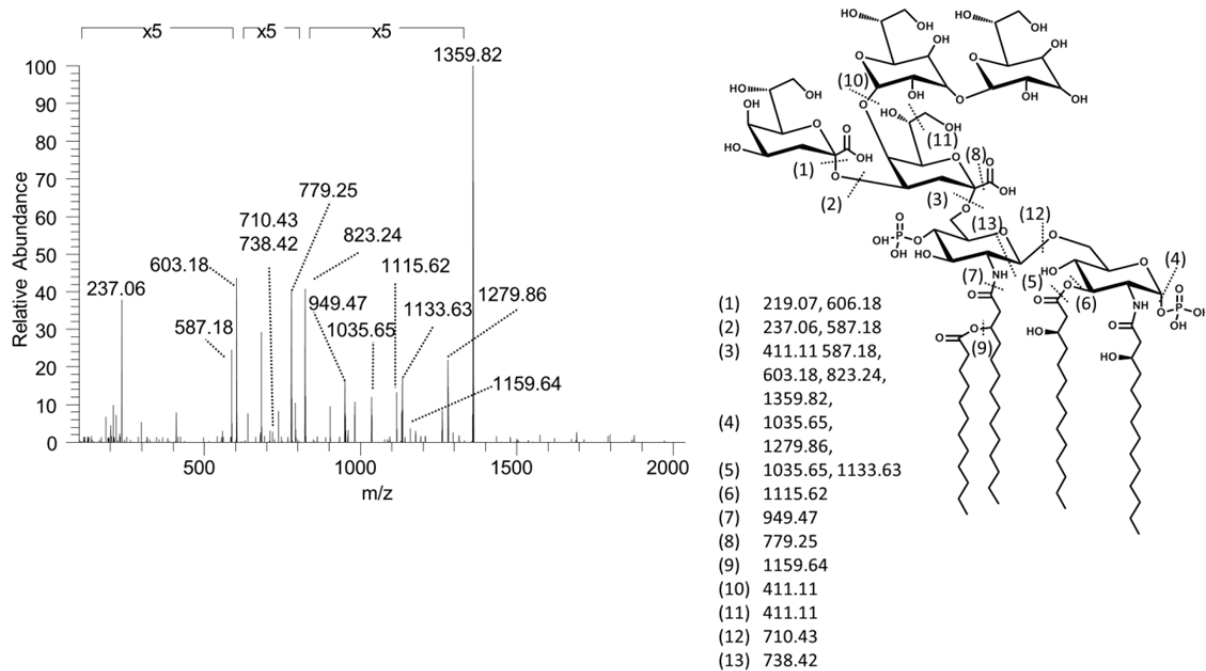

**Figure S4.** UVPD/HCD mass spectrum of tetra-acyl waaQwaaG ( $z = 3-$ ) [ $M_r = 2185.07$ ] BN1  $\Delta$ waaQwaaG. The corresponding fragmentation map is shown on the right.

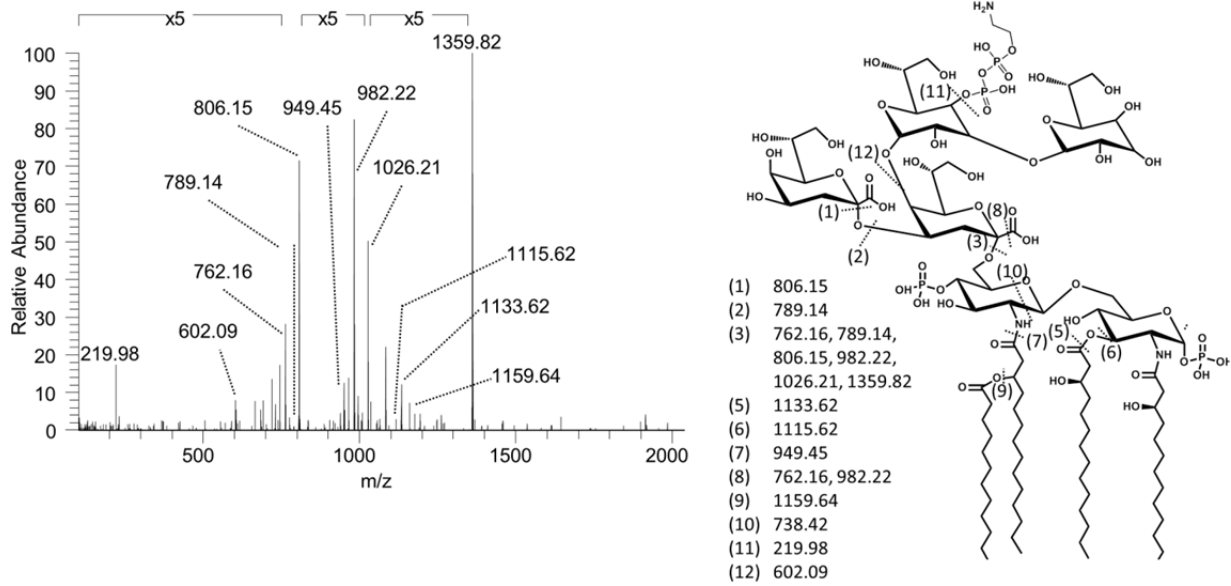

**Figure S5.** UVPD/HCD mass spectrum of tetra-acyl waaQwaaG + PPEtN ( $z = 3^-$ ) [ $M_r = 2388.06$ ] BN1  $\Delta$ waaQwaaG. The corresponding fragmentation map is shown on the right.

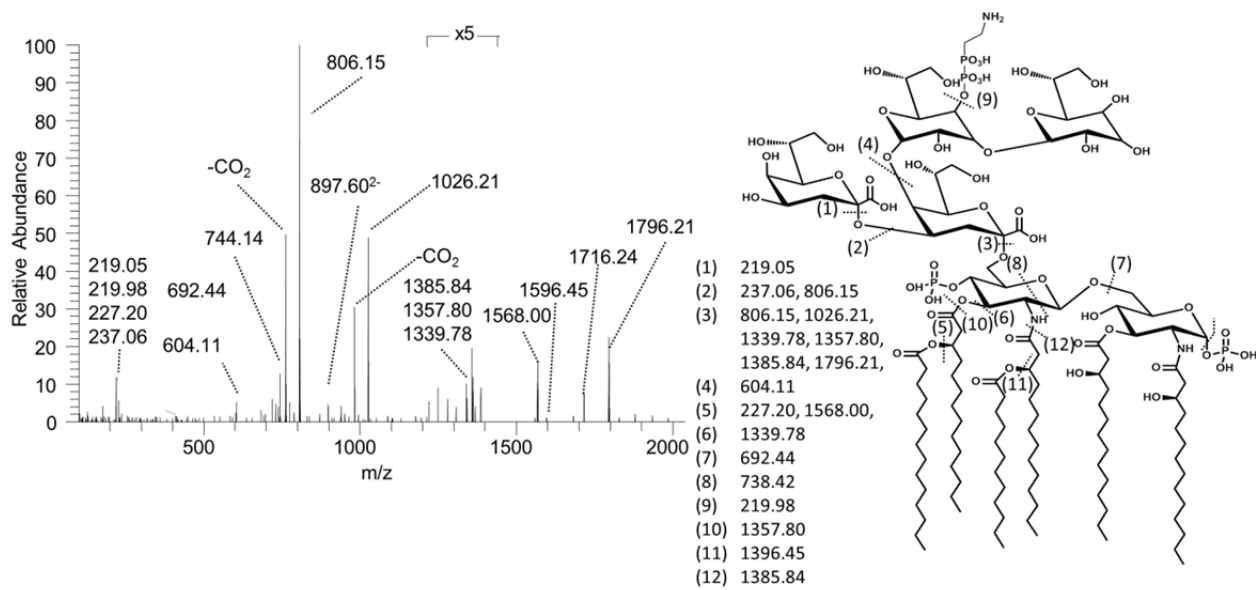

**Figure S6.** UVPD/HCD mass spectrum of waaQwaaG + PPEtN ( $z = 3^-$ ) [ $M_r = 2824.44$ ] BN1  $\Delta$ waaQwaaG. The corresponding fragmentation map is shown on the right.

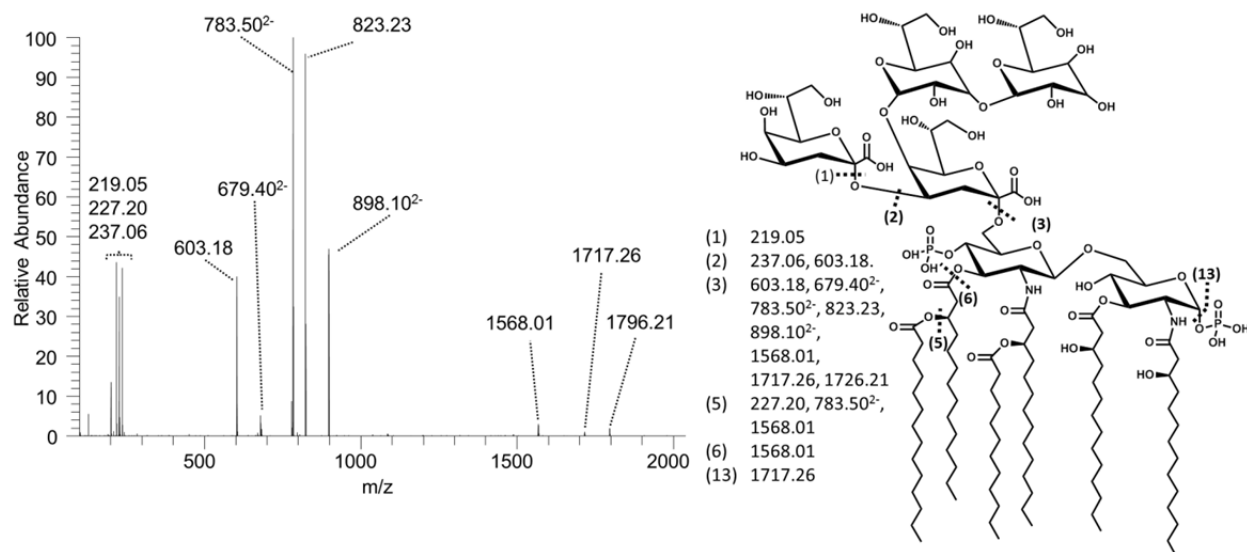

**Figure S7.** HCD mass spectrum of hexa-acylated waaQwaaG ( $z = 3^-$ ) [ $M_r = 2621.46$ ] from BN1  $\Delta$ waaQwaaG. The corresponding fragmentation map is shown on the right.



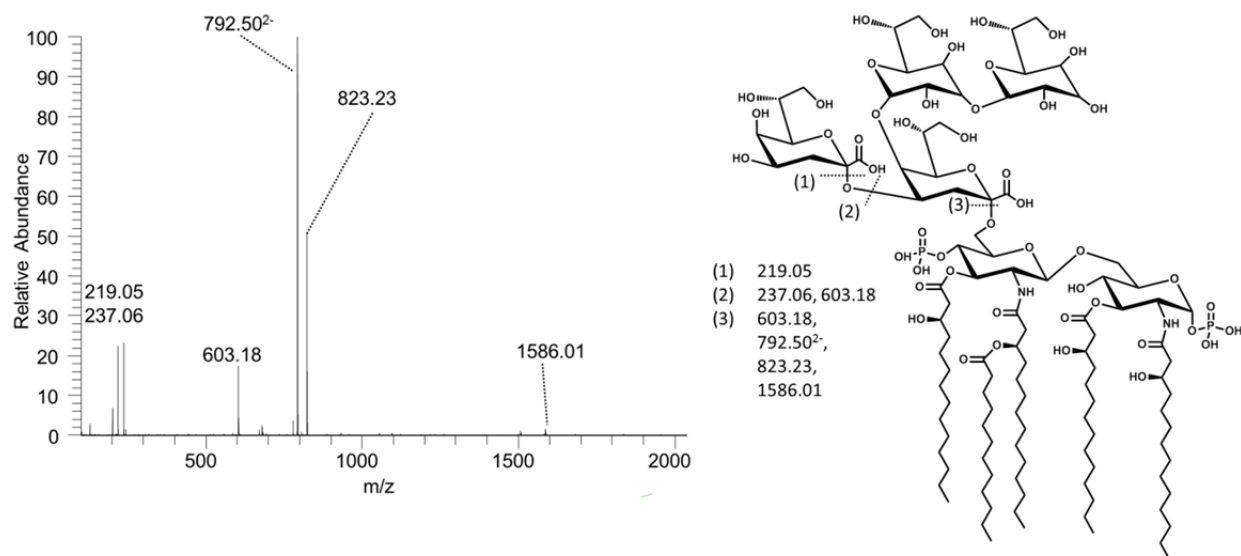

**Figure S8.** HCD mass spectrum of penta-acyl waaQwaaG ( $z = 3^-$ ) [Mr = 2411.27] from BN1  $\Delta$ waaQwaaG. The corresponding fragmentation map is shown on the right.

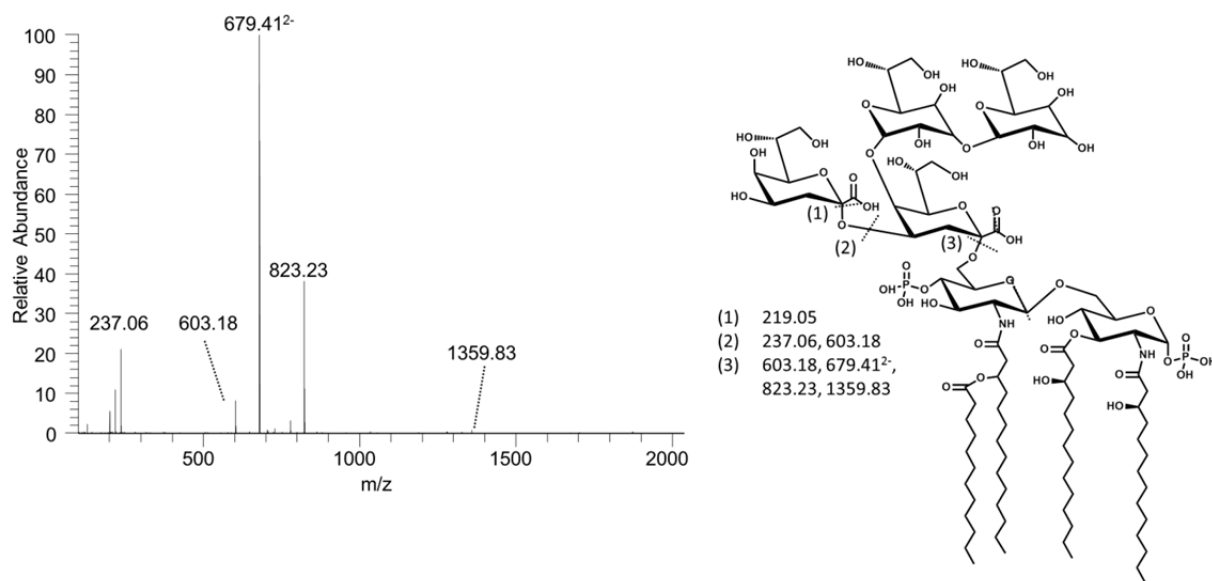

**Figure S9.** HCD mass spectrum of tetra-acyl waaQwaaG (z = 3-) [ $M_r = 2185.07$ ] from BN1  $\Delta$ waaQwaaG. The corresponding fragmentation map is shown on the right.

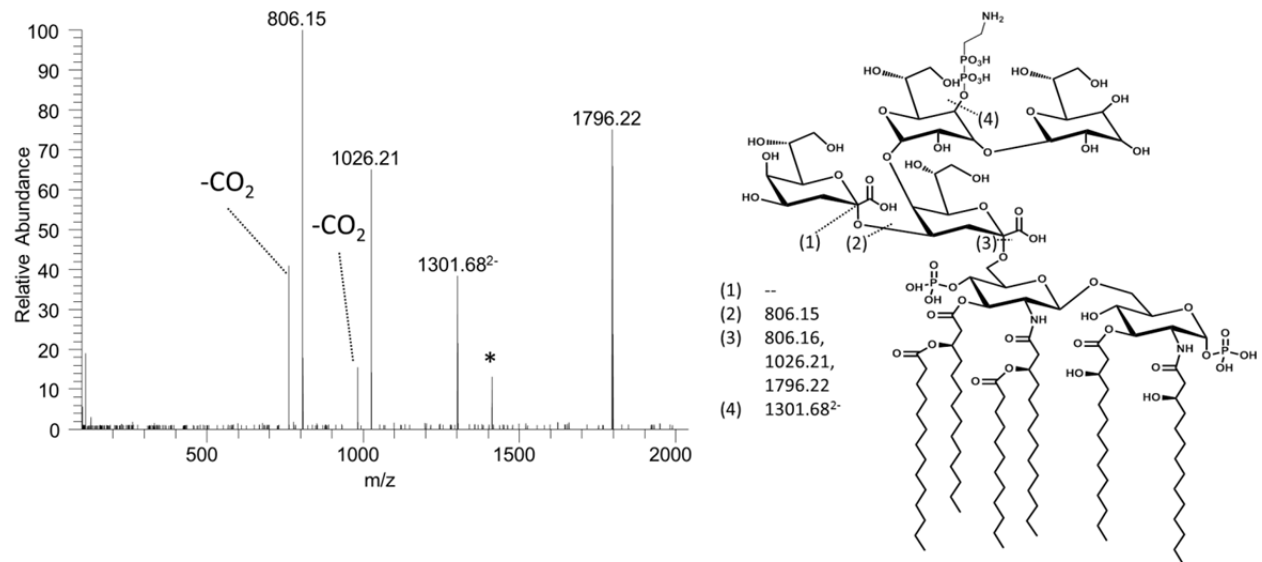

**Figure S10.** HCD mass spectrum of waaQwaaG + PPEtN ( $z = 2^-$ ) [ $M_r = 2824.44$ ] from BN1  $\Delta$ waaQwaaG. The corresponding fragmentation map is shown on the right.

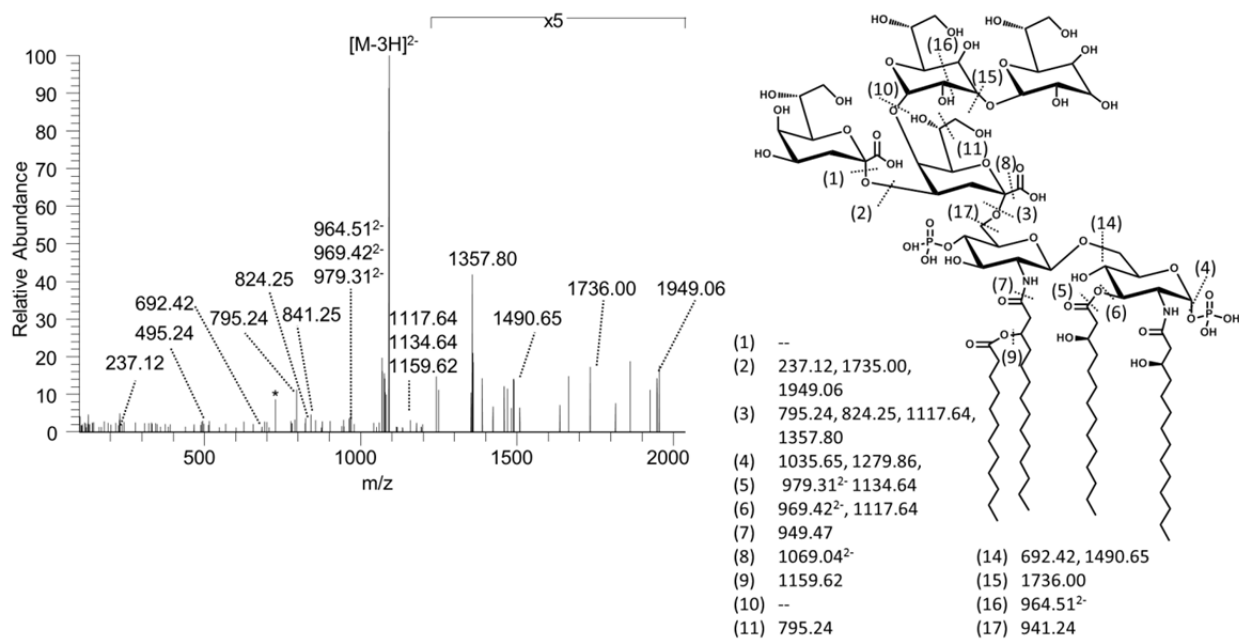

**Figure S11.** UVPD mass spectrum of tetra-acyl waaQwaaG (z = 3-) [Mr = 2185.07] from BN1  $\Delta$ waaQwaaG. The corresponding fragmentation map is shown on the right.

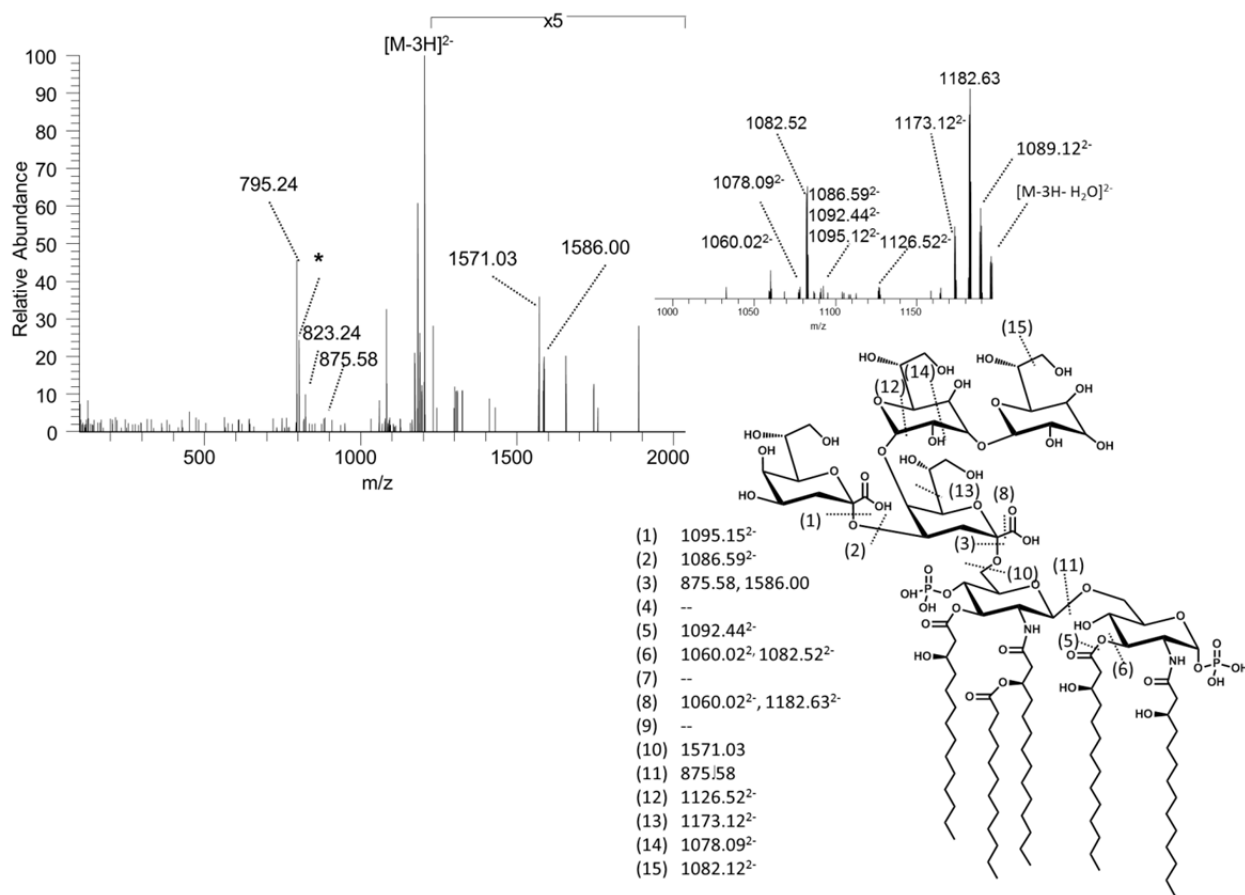

**Figure S12.** UVPD mass spectrum of penta-acyl waaQwaaG ( $z=3$ -) [ $M_r = 2411.27$ ] from BN1  $\Delta$ waaQwaaG. The corresponding fragmentation map is shown on the right.

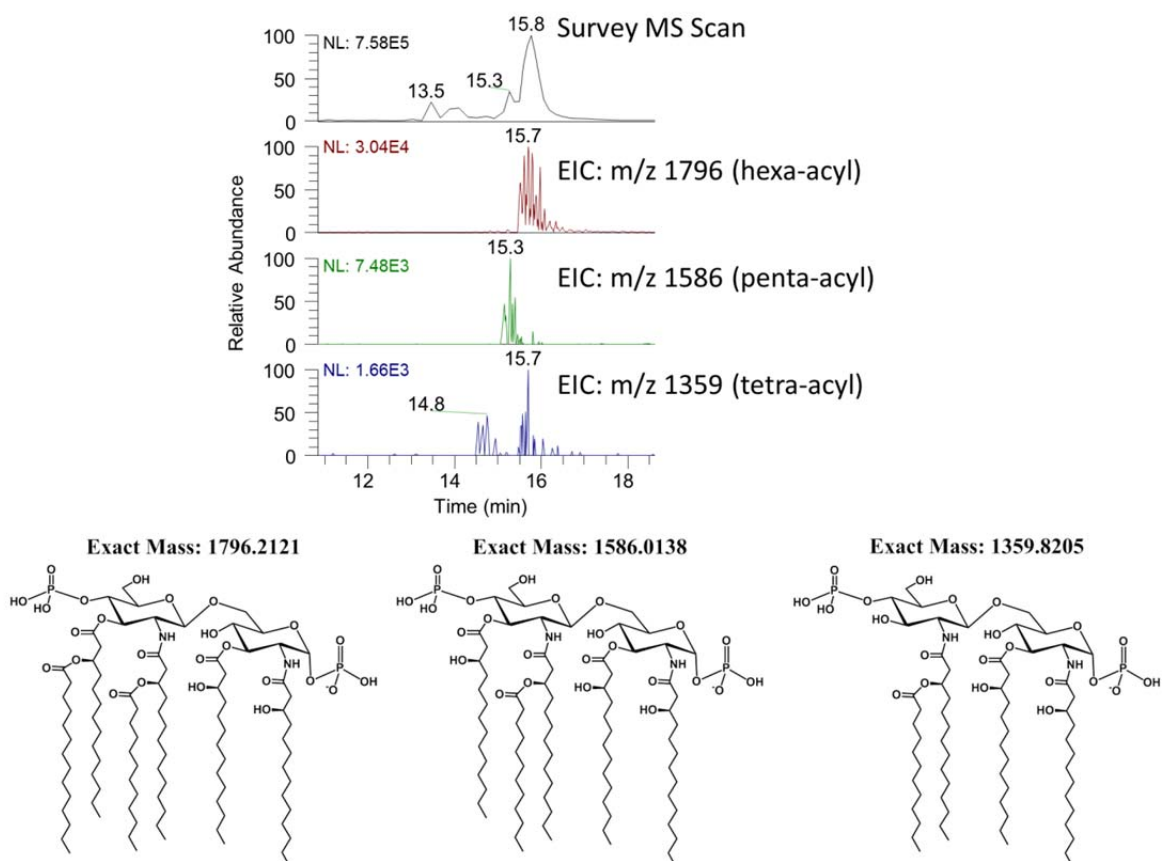

**Figure S13:** LC-MS trace and extracted ion chromatograms of the UVPD/HCD fragment ions associated with the identified BN1 LOS lipid A anchors . The structures of the different fragment ions are shown below.

| Fragment Ion (m/z)                                      | Cleavage Site(s) |
|---------------------------------------------------------|------------------|
| 219.05 (B <sub>1</sub> )                                | 1                |
| 227.20                                                  | 5                |
| 237.06 (C <sub>1</sub> )                                | 2                |
| 395.12                                                  | 4, 20            |
| 411.11                                                  | 3, 20            |
| 439.11 (B <sub>2</sub> )                                | 3                |
| 692.41 (Z <sub>1</sub> )                                | 19               |
| 710.42 (Y <sub>1</sub> )                                | 18               |
| 738.42 ( <sup>1,5</sup> X <sub>1</sub> )                | 17               |
| 890.46 <sup>2-</sup>                                    | 8                |
| 897.60 <sup>2-</sup> (Y <sub>2</sub> )                  | 3                |
| 898.96 <sup>2-</sup>                                    | 7                |
| 913.48 <sup>2-</sup>                                    | 12               |
| 926.97 <sup>2-</sup>                                    | 11               |
| 934.48 <sup>2-</sup>                                    | 10               |
| 972.55 <sup>2-</sup>                                    | 14, 22           |
| 995.56 <sup>2-</sup>                                    | 14               |
| 982.06 <sup>2-</sup>                                    | 13, 22           |
| 999.63 <sup>2-</sup> (Z <sub>3</sub> )                  | 2                |
| 1004.56 <sup>2-</sup>                                   | 5                |
| 1007.63 <sup>2-</sup> (Y <sub>3</sub> )                 | 1                |
| 1018.07 <sup>2-</sup>                                   | 9                |
| 1026.07 <sup>2-</sup>                                   | 16               |
| 1040.07 <sup>2-</sup>                                   | 15               |
| 1043.14 <sup>2-</sup> ( <sup>0,2</sup> X <sub>3</sub> ) | 23               |
| 1056.15 <sup>2-</sup> ( <sup>0,3</sup> X <sub>3</sub> ) | 24               |
| 1066.14 <sup>2-</sup> ( <sup>4,5</sup> X <sub>3</sub> ) | 25               |
| 1086.66 <sup>2-</sup>                                   | 20               |
| 1095.66 <sup>2-</sup>                                   | 22               |
| 1105.15 <sup>2-</sup>                                   | 26               |
| 1243.82                                                 | 3, 6, 8          |
| 1324.83                                                 | 4, 8             |
| 1341.81                                                 | 3, 8             |
| 1369.84                                                 | 4, 12            |
| 1538.98                                                 | 13, 21           |
| 1541.89 (C <sub>5</sub> )                               | 19               |
| 1551.99                                                 | 3, 14            |
| 1569.00                                                 | 3, 5             |
| 1585.93 ( <sup>0,4</sup> A <sub>4</sub> )               | 27               |
| 1596.02                                                 | 3, 9             |
| 1613.93 ( <sup>0,3</sup> A <sub>4</sub> )               | 28               |
| 1717.24                                                 | 3, 6             |
| 1779.22                                                 | 4                |
| 1780.91                                                 | 8                |
| 1796.22                                                 | 3                |
| 1825.95                                                 | 12               |
| 1853.95                                                 | 11               |
| 1867.19 ( <sup>1,5</sup> X <sub>2</sub> )               | 30               |
| 1946.11                                                 | 14, 22           |
| 1954.27 ( <sup>2,4</sup> X <sub>2</sub> )               | 29               |
| 1964.13                                                 | 13, 22           |
| 1991.12                                                 | 14               |
| 1999.27 (Z <sub>5</sub> )                               | 2                |

**Table S1.** List of fragment ions from UVPD of triply deprotonated Kdo2-lipid A [Mr = 2237.34] and their corresponding cleavage sites. The fragmentation cleavage map is shown in Figure 3.

| <b>LOS</b>                                      | <b>Total (percentage)</b> |
|-------------------------------------------------|---------------------------|
| Tetra Acyl waaQwaaG                             | 11 ± 1%                   |
| Tetra Acyl waaQwaaG+PPeTn                       | 4 ± 1%                    |
| Penta Acyl waaQwaaG                             | 20 ± 1%                   |
| Penta Acyl waaQwaaG+PPeTn                       | 6 ± 1%                    |
| Hexa Acyl waaQwaaG                              | 42 ± 2%                   |
| Hexa Acyl waaQwaaG+PPeTn                        | 17 ± 1%                   |
|                                                 |                           |
| <b>Lipid A Anchor</b>                           | <b>Total (percentage)</b> |
| Tetra Acyl waaQwaaG + Tetra Acyl waaQwaaG+PPeTn | 15 ± 1%                   |
| Penta Acyl waaQwaaG + Penta Acyl waaQwaaG+PPeTn | 27 ± 1%                   |
| Hexa Acyl waaQwaaG + Hexa Acyl waaQwaaG+PPeTn   | 58 ± 2%                   |
|                                                 |                           |
| <b>LOS Glycoform</b>                            | <b>Total (percentage)</b> |
| waaQwaaG without PPeTn                          | 73 ± 2%                   |
| waaQwaaG with PPeTn                             | 27 ± 2%                   |
|                                                 |                           |
| <b>PPeTn Modified:Unmodified</b>                | <b>Ratio</b>              |
| Tetra Acyl waaQwaaG+PPeTn:Tetra Acyl waaQwaaG   | 0.32:1                    |
| Penta Acyl waaQwaaG+PPeTn:Penta Acyl waaQwaaG   | 0.31:1                    |
| Hexa Acyl waaQwaaG+PPeTn:Hexa Acyl waaQwaaG     | 0.40:1                    |

**Table S2.** Calculated acylation patterns and glycoforms observed for LOS identified within the BN1  $\Delta$ waaQwaaG sample. Percentages were calculated using the extracted ion chromatogram areas listed in Supplemental Table 3, based on the LCMS data in Figure 4A.



|                           | Injection 1 |       | Injection 2 |       | Injection 3 |       | Mean      | Coefficient of Variation (%) |
|---------------------------|-------------|-------|-------------|-------|-------------|-------|-----------|------------------------------|
|                           | Area        | RT    | Area        | RT    | Area        | RT    |           |                              |
| Tetra Acyl waaQwaaG       | 64425241    | 14.91 | 68980738    | 14.94 | 72720858    | 14.95 | 68708946  | 6%                           |
| Tetra Acyl waaQwaaG+PPeTn | 23758295    | 14.8  | 21179094    | 14.83 | 21605118    | 14.85 | 22180836  | 6%                           |
|                           |             |       |             |       |             |       |           |                              |
|                           | Area        | RT    | Area        | RT    | Area        | RT    |           |                              |
| Penta Acyl waaQwaaG       | 118269085   | 15.50 | 130787353   | 15.46 | 121327502   | 15.44 | 123461313 | 5%                           |
| Penta Acyl waaQwaaG+PPeTn | 34726036    | 15.42 | 40327010    | 15.37 | 40387047    | 15.35 | 38480031  | 8%                           |
|                           |             |       |             |       |             |       |           |                              |
|                           |             | RT    | Area        | RT    | Area        | RT    |           |                              |
| Hexa Acyl waaQwaaG        | 239684831   | 16.01 | 248163403   | 15.92 | 268538772   | 15.95 | 252129002 | 6%                           |
| Hexa Acyl waaQwaaG+PPeTn  | 97530633    | 15.76 | 104989335   | 15.83 | 98301572    | 15.78 | 100273847 | 4%                           |

**Table S3.** Extracted ion chromatogram areas, retention times, mean peak areas and mean coefficient of variation for observed from BN1  $\Delta$ waaQwaaG LOS based on the LCMS data shown in Figure 4A.

| LPS                              | Observed m/z | Calculated m/z | Mass Error (ppm) | Retention Time (minutes) | Percent |
|----------------------------------|--------------|----------------|------------------|--------------------------|---------|
| Tetra Acyl waaOwaaQ + P          | 1293.5631    | 1293.5638      | -5.02            | 14.8 ± 0.1               | 2 ± 0%  |
| Tetra Acyl waaOwaaQ + PPetN      | 1355.0669    | 1355.0680      | -8.12            | 14.8 ± 0.1               | 2 ± 0%  |
| Penta Acyl waaOwaaQ + P          | 1406.6606    | 1406.6604      | 1.42             | 15.0 ± 0.3               | 4 ± 0%  |
| Penta Acyl waaOwaaQ + PPetN      | 1468.1648    | 1468.1647      | 1.02             | 15.4 ± 0.1               | 9 ± 1%  |
| Hexa Acyl waaOwaaQ + P           | 1511.7593    | 1511.7596      | -1.98            | 15.8 ± 0.1               | 32 ± 3% |
| Hexa Acyl waaOwaaQ+PPetN         | 1573.2643    | 1573.2639      | 2.86             | 15.8 ± 0.1               | 35 ± 5% |
| Hexa Acyl<br>waaOwaaQ+PPetN+PEtN | 1634.7681    | 1634.7681      | 0.00             | 15.7 ± 0.1               | 10 ± 1% |
| Hexa Acyl waaO+P                 | 1709.2782    | 1709.2787      | -2.93            | 15.6 ± 0.1               | 7 ± 1%  |

**Table S4.** List of identified LOS within the BN1 E. coli sample via LC-MS. Percentages were calculated using the extracted ion chromatogram areas listed in Supplemental Table 5 based on the LCMS data in Figure 5A.

| LPS                  | Injection 1 | Injection2 | Injection3 | Mean     | Coefficient of Variation (%) |
|----------------------|-------------|------------|------------|----------|------------------------------|
| lpxR waaOwaaQ + P    | 851794      | 932533     | 896764     | 893697   | 5%                           |
| lpxR waaOwaaQ + PPtN | 876229      | 1202284    | 1021826    | 1033446  | 16%                          |
| lpxM waaOwaaQ + P    | 2145795     | 2036369    | 1868549    | 2016904  | 7%                           |
| lpxM waaOwaaQ + PPtN | 4501591     | 4889663    | 4476764    | 4622673  | 5%                           |
| waaOwaaQ + P         | 15487393    | 14771080   | 17766181   | 16008218 | 10%                          |
| waaOwaaQ+PPtN        | 14746187    | 18520179   | 19092010   | 17452792 | 14%                          |
| waaOwaaQ+PPtN+PtN    | 4157964     | 5093298    | 5353392    | 4868218  | 13%                          |
| waaO+ P              | 3233134     | 3764114    | 3894881    | 3630710  | 10%                          |

**Table S5.** Extracted ion chromatogram areas, mean peak areas and mean coefficient of variation observed from BN1 based on the LCMS data shown in Figure 5A.
